# Supplementary material for: Polymer vesicles formed by amphiphilic diblock copolymers containing a thermotropic liquid crystalline polymer block
Source: Royal Society of Chemistry journal article supplement (doi:10.1039/b508034g), 2005-01-01
Supplement: b508034g.pdf [file b508034g.pdf]

Electronic Supplementary Information (ESI) :

Synthesis of the macroinitiator MPEG2000-Br :

In a typical reaction, MPEG2000 (5.5 g, 5 mmol) and triethylamine (1.21 g, 12 mmol) were mixed in anhydrous CH<sub>2</sub>Cl<sub>2</sub> (100 mL) in an ice bath. A solution of 2.37 g (11 mmol) of 2-bromopropionyl bromide in anhydrous CH<sub>2</sub>Cl<sub>2</sub> (20 mL) was added dropwise over 2 h under dry argon. The solution was then allowed to warm to room temperature and was stirred for 48 h. The precipitate was removed by filtration. The filtrate was poured into water and the water phase was extracted with CH<sub>2</sub>Cl<sub>2</sub> three times. The combined organic phase was further washed with 1.0 M HCl and 1.0 M NaOH aqueous solutions successively and dried over anhydrous Na<sub>2</sub>SO<sub>4</sub>. After solvent removal, the crude product was purified twice by dissolving in 10 mL of CH<sub>2</sub>Cl<sub>2</sub> and precipitation with 300 mL of diethyl ether.

Synthesis of the block copolymers PEG-*b*-PA444 and PEG-*b*-PMAazo444:

A general ATRP procedure for the synthesis of PEG-*b*-PA444 is as follows. A Schlenk flask with a magnetic stir bar was charged with Cu<sup>I</sup>Br (14.42 mg, 0.1 mmol), MPEG-Br macroinitiator (0.213g, 0.1 mmol), 4,4'-di(*n*-nonyl)-2,2'-bipyridine (bpy9) (from Aldrich) (81.6 mg, 0.2 mmol) and monomer A444 (0.632 g, 1 mmol). The flask was degassed by four vacuum-argon cycles. Toluene (1 mL), degassed by argon bubbling for 30 min, was then introduced into the flask using a syringe purge with argon. The flask was further degassed by three freeze-pump-thaw cycles, and then immersed in an oil bath thermostated at 80 °C. After 24 h of reaction, the mixture was cooled to room temperature. The resulting polymer solution was poured into a large volume of diethyl ether. The precipitated diblock copolymer was purified 3 times by dissolution in a small amount of acetone and precipitation into a large volume of diethyl ether, and once by dissolution in acetone and precipitation into methanol. The purified polymer was dried under vacuum at room temperature for 2 days. Yield: 0.4g (47%).

In the synthesis of PEG-*b*-PMAazo444, Cu<sup>I</sup>Br<sub>2</sub> (1.11 mg, 0.005 mmol, 5 mol% relative to Cu<sup>I</sup>Br) and additional bpy9 (4.08 mg, 0.01 mmol) were introduced into the polymerization system. The reaction solution was stirred at 40°C for 2.5 h. All other reaction conditions and purification procedures for this copolymer were the same as described above. Yield: 0.32g (37%).

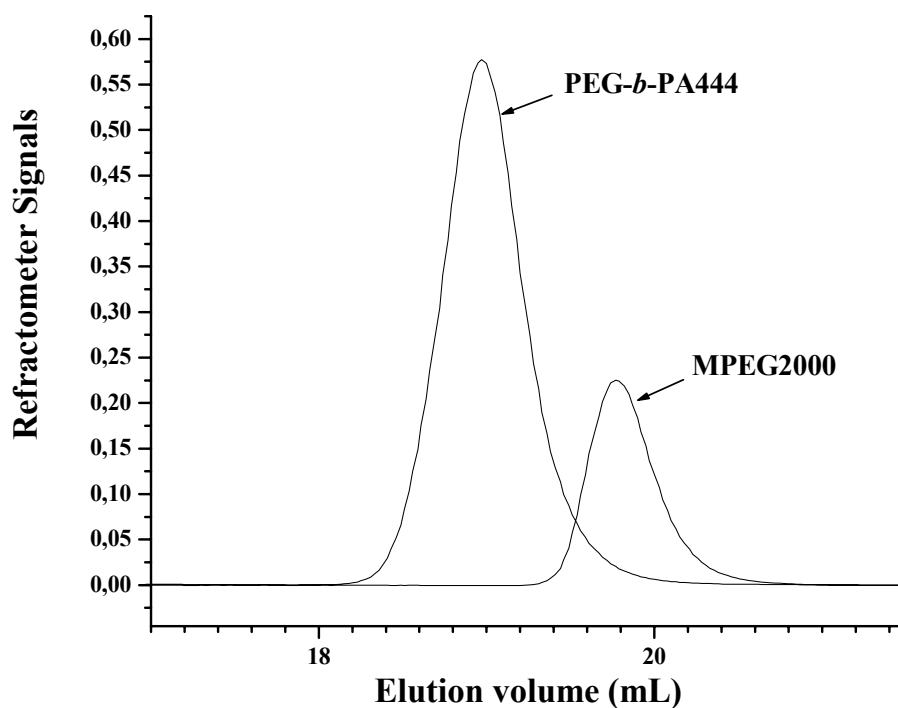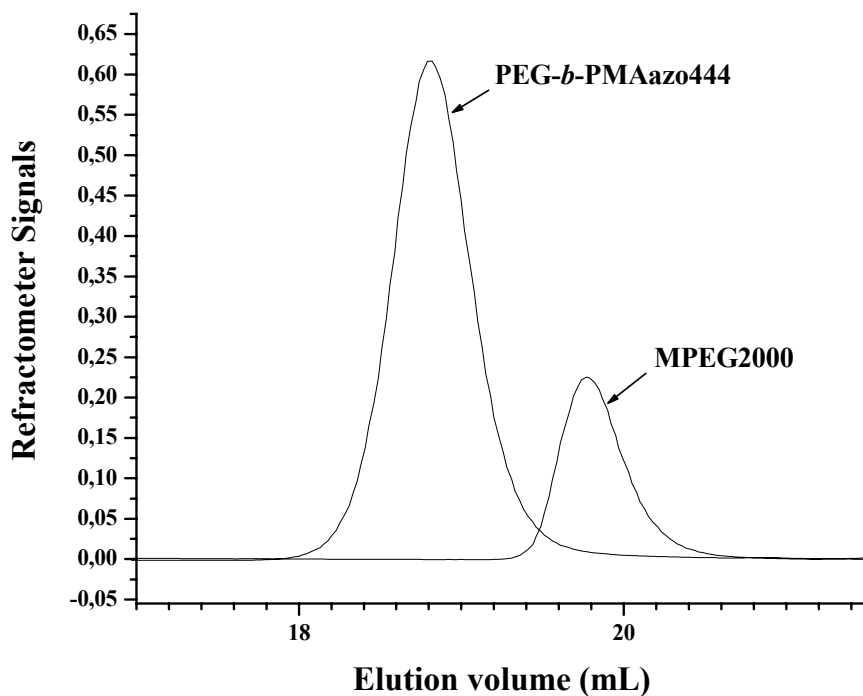

**Figure 1.** SEC chromatograms of MPEG2000 and the two block copolymers PEG-*b*-PA444 and PEG-*b*-PMAazo444.

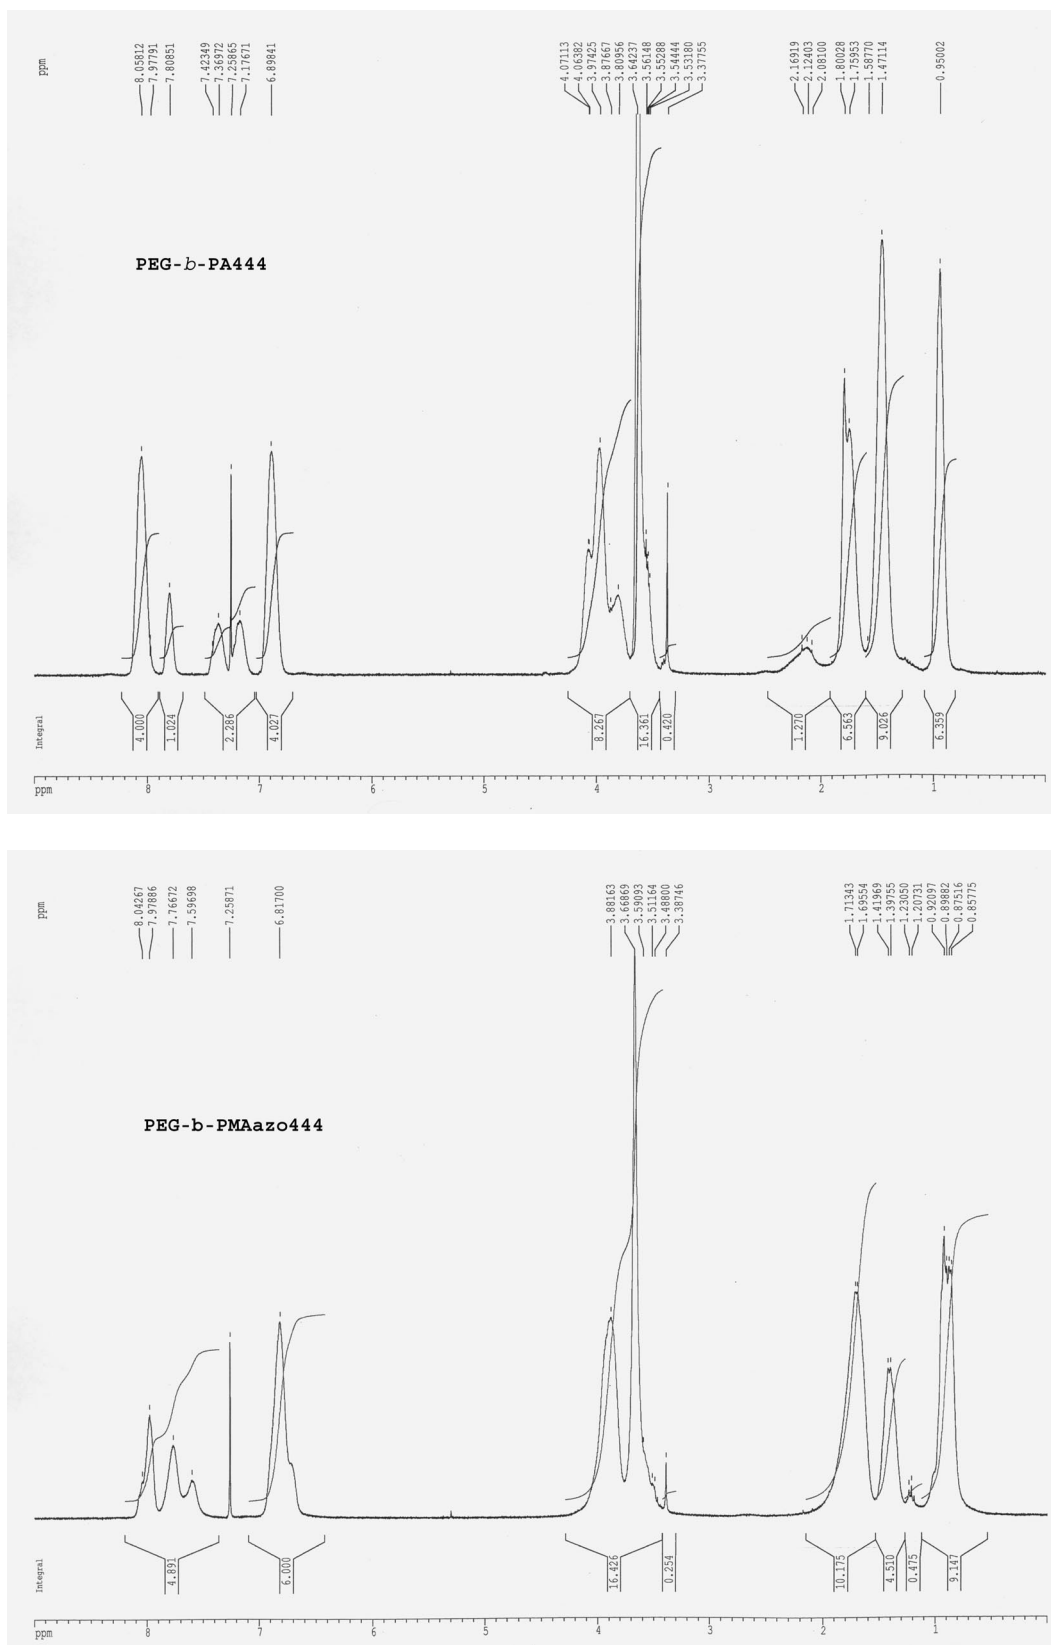

**Figure 2.**  $^1\text{H}$  NMR spectra of PEG-*b*-PA444 and PEG-*b*-PMAazo444
